# Supplementary material
Source: Springer Nature journal article supplement (https://www.springermedizin.de/resource/supplementary/12893_2011_210_MOESM2_ESM.pdf/9511828)

**721 papers identified in electronic databases**

**MEDLINE 253 Cochrane 218**  
**EMBASE 131 CINAHL 119**

**Controlled-trials.com 0**  
**Clinaltrials.gov 0**  
**centerwatch.com 0**

**644 papers excluded**

415 screening of title/abstract  
229 duplicates

**77 papers assessed**

**46 papers excluded**

24 No RCT/CCT  
2 Non-hospital setting  
8 Not adult AUD surgical or ED patients  
8 No alcohol cessation intervention  
2 No data on AUD definition or method  
2 No data on screening, acceptance, FU

**31 papers**

**2 hand search included**

**33 papers included**

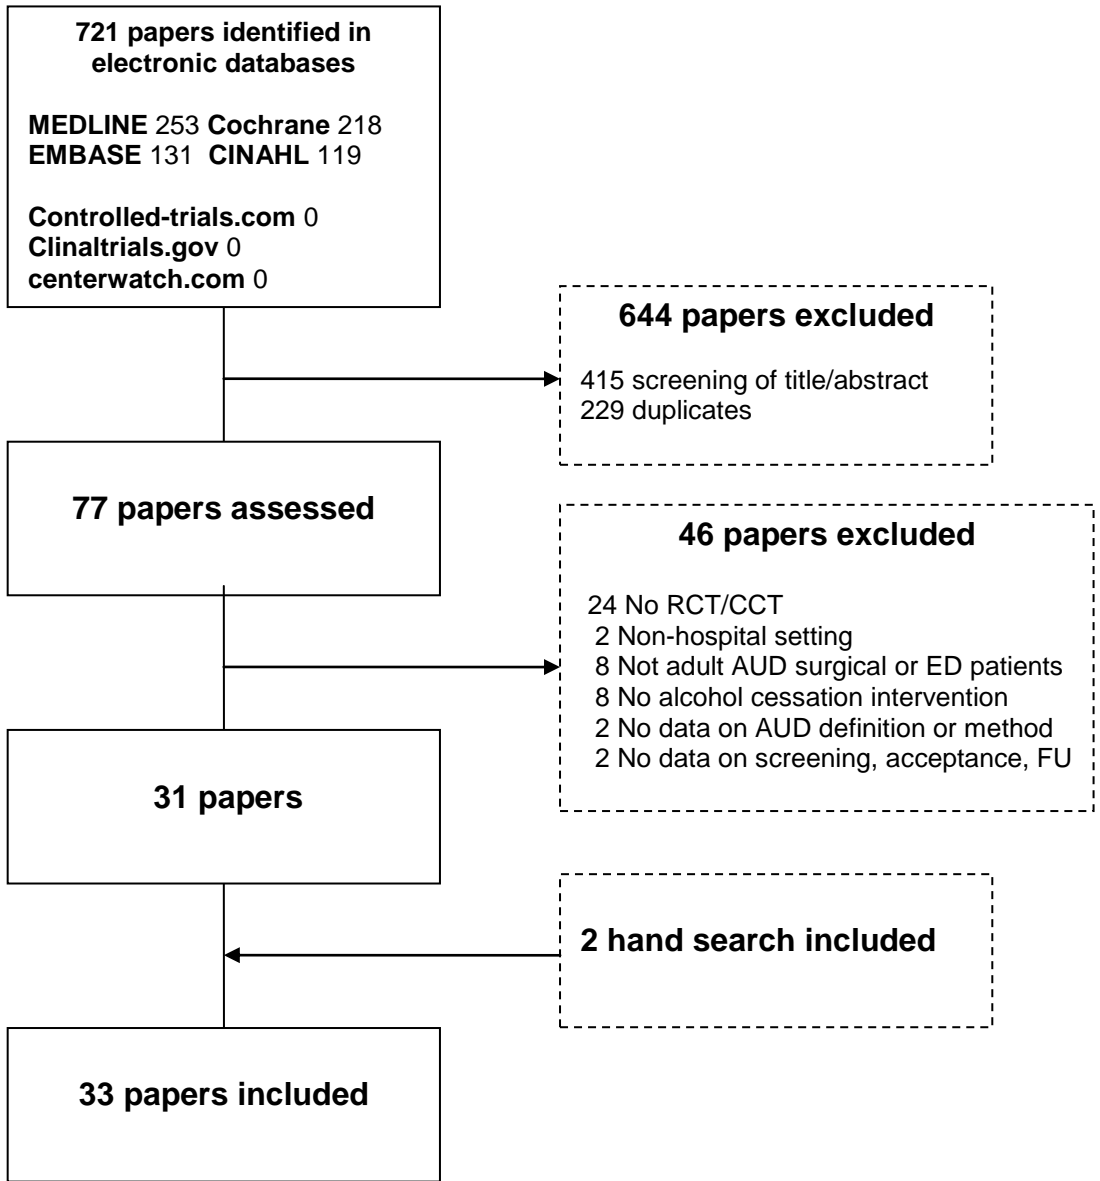

Supplement: MOESM2 [file 9511828]
